1 ***“We are their eyes and ears here on the ground, yet they do not appreciate us” -***  
2 **Factors influencing the performance of Kenyan community health volunteers**  
3 **working in urban informal settlements**

4  
5 Michael O Ogutu<sup>\*1</sup>, Eric Kamui<sup>1</sup>, Timothy Abuya<sup>2</sup>, Kui Muraya<sup>1,2</sup>.

6 1. Health Systems & Research Ethics Department, KEMRI-Wellcome Trust  
7 Research Programme, Nairobi, Kenya

8 2. Population Council, Kenya

9 [\\*mogutu@kemri-wellcome.org](mailto:mogutu@kemri-wellcome.org); [michealogutu06@yahoo.com](mailto:michealogutu06@yahoo.com)

10  
11  
12  
13  
14  
15  
16  
17  
18  
19  
20  
21  
22  
23  
24  
25  
26  
27  
28  
29  
30

31 **Abstract**

32 Community Health Volunteers (CHVs) play a crucial role in linking the community with the  
33 formal health system, particularly in low- and middle-income countries. Studies in Kenya  
34 have focused on the implementation of the Kenya Community Health Strategy (CHS) in  
35 rural, nomadic, and peri-urban areas; with limited information on the factors that influence  
36 CHV performance in urban informal settlements. This study therefore explored factors  
37 that influence CHV performance in urban informal settlements within Nairobi Kenya and  
38 ways in which CHVs can be supported to enhance their wellbeing and strengthen  
39 community strategies. The study was undertaken in two urban informal settlements within  
40 Nairobi County. Thirteen focus group discussions (total of 123 participants) and three key  
41 informant interviews were conducted with a range of respondents. Various topics covering  
42 the design of the Community Health Strategy (CHS) and broader contextual factors that  
43 affect CHVs' performance, were discussed and the data analysed using a framework  
44 analysis approach. The key programme design factors identified as influencing the  
45 performance of CHVs working in urban informal setting included: CHV recruitment;  
46 training; the availability of supplies and resources; and the remuneration of CHVs. Health  
47 system factors that influenced CHVs performance included: nature of relationship  
48 between healthcare workers at local referral facilities and community members; the  
49 availability of services and perceived corruption at the referral facilities; and CHV referral  
50 outside of the local health facility. Whereas the broader contextual factors that affected  
51 CHV performance at the community level included: demand for material or financial  
52 support; perceived corruption in community programmes; and neighbourhood insecurity.  
53 These findings suggest that like other CHVs working in both the rural and peri-urban  
54 settings, CHVs working in urban informal settlements in Kenya face a myriad of

55 challenges that impact on their wellbeing and work performance. Therefore, to enhance  
56 CHVs' well-being and improve their performance, the following should be considered:  
57 adequate and timely remuneration for CHVs, appropriate holistic training, adequate  
58 supportive supervision, and ensuring a satisfactory supply of resources and supplies.  
59 Additionally, at the health facility level, healthcare workers should be trained on  
60 appropriate and respectful relations with both the community and the CHVs, clarity of  
61 roles and scope of work, ensure availability of services, and safeguard against corrupt  
62 practices in public health facilities. Lastly, there is a need for improved and adequate  
63 security measures at the community level, to ensure safety of CHVs as they undertake  
64 their roles.

65

66

67

## 68 **Introduction**

69 Community health workers (CHW) are an important part of the health system, particularly  
70 in low- and middle-income countries (LMICs); and play a crucial role in linking the  
71 community with the formal health system. Different terms are used to refer to CHWs  
72 depending on context (1,2). For example, in India, they are referred to as Accredited  
73 Social Health Activists (ASHAs) while in other contexts they are known as lay health  
74 workers, traditional birth attendants, lay counsellors. For this paper, we broadly refer to  
75 them as community health volunteers (CHVs), which also aligns with the terminology  
76 used in Kenya.

77 Literature from LMICs shows that when involved efficiently, CHVs can improve access to  
78 primary health care services including: maternal and neonatal health services (3,4);  
79 psychosocial support services such as counselling, to individuals experiencing mental  
80 health problems like anxiety and depression (5,6); and the provision of preventive health  
81 education on topics such as hygiene and sanitation (7), exclusive breastfeeding (8,9) and  
82 family planning (10). CHV programmes also promote the provision of services such as  
83 child immunization (11), and in responding to major health outbreaks as was observed  
84 during the Ebola outbreak in West and Central Africa (12); and more recently with the  
85 COVID-19 pandemic in Kenya (13). Thus, CHVs are important actors in ultimately  
86 improving health outcomes, particularly in low-resource settings (14–18).

87 A systematic review by Kok et al., showed that the success of CHV programmes depends  
88 on three key aspects: programme design factors, health system factors, and broad  
89 contextual factors surrounding the workings of such programmes as shown in figure  
90 1(2,19,20). This work was guided by the Kok et al., (2015) framework (figure 1). According

91 to Kok and colleagues, programme design factors are features of the programme or  
92 intervention design that have a direct influence on CHVs' performance and can be directly  
93 modified and adjusted to motivate maximum CHV performance (20). They include  
94 remuneration, recruitment, supervision and workload, community and health system  
95 links, and resources and logistics (2). Contextual factors relate to the setting in which the  
96 CHVs are working. That is, the broader environment, community, and economy; and the  
97 health system policy and practice (21). Health system factors on the other hand include  
98 issues related to human resources for health policies, service delivery, financing, and  
99 governance (20).

100 CHV performance can be measured at two levels, the individual (CHV) level and at the  
101 end-user (community) level (20). Attributes that are measured at the individual level  
102 include the cognitive, affective, and behavioural changes in the CHV such as self-esteem,  
103 attitude, motivation, job satisfaction, competencies/knowledge levels and guideline  
104 adherence. Whereas at the end-user or community level, one can measure CHV-  
105 attributable outcomes in the community. Such outcomes include for instance; credibility  
106 or trust in the CHVs, increased use or awareness of a health service, or the acceptance  
107 and use of services provided at a health facility following referral by a CHV (20). This work  
108 focused on assessment at the *individual* level as highlighted in bold in figure 1.

109 **Figure 1: Kok et. al (2015) framework**

110 Literature shows that context matters when it comes to the performance of CHVs. It is,  
111 therefore, important to understand factors influencing CHV performance in specific  
112 contexts such as urban informal settlements (UIS). For example, in addition to the factors

113 highlighted above, a systematic review by Ogutu et al., (22) showed that specific to UIS  
114 in LMICs, some of the factors that negatively impacted on the performance of CHVs at  
115 the broader contextual level in UIS included insecurity and the demand for material or  
116 financial support by households.

117 In Kenya, it is estimated that more than half of the urban population lives in informal  
118 settlements, with 56% residing in the capital city Nairobi (23). These populations are often  
119 characterized by a high burden of disease and limited access to health care (24–28). To  
120 increase health care access in these and other settings, in 2006 the government rolled  
121 out the Kenya Community Health Strategy (CHS). In brief, this strategy predominantly  
122 relies on CHVs to deliver a range of services, and act as a link between the formal  
123 healthcare system and the community (30–33). The CHVs act as a link to the primary  
124 health facilities through government-employed Community Health Assistants (CHAs),  
125 formerly known as Community Health Extension Workers (CHEWs). CHAs are trained  
126 health workers linked to a specific primary health care facility and provide support and  
127 supervision to an assigned number of CHVs.

128 Current Kenyan studies on CHVs have focused on nomadic, rural, and peri-urban areas  
129 with less attention given to UIS (34–41). Drawing on the Kenya CHS as the ‘intervention’  
130 or ‘programme’ under implementation; this study therefore aimed to explore factors that  
131 affect CHV performance in UIS within Nairobi, Kenya. This study also aimed to identify  
132 and explore ways in which CHVs can be better supported to enhance their wellbeing and  
133 strengthen community strategies.

## 134 **Methods**

135 *Study sites*

136 This qualitative exploratory study was conducted in two UIS (Kibera and Mathare) of  
137 Nairobi County. Kibera also known as Kibra is one of the largest informal settlements in  
138 East Africa (42), and is one of the 17 sub-counties within Nairobi County. It is located  
139 approximately 5 km southwest of the Nairobi central business district (CBD) and occupies  
140 12.1km<sup>2</sup>. It is sub-divided into 14 sub-sections commonly referred to as ‘villages’ as  
141 indicated in figure 2 (43,44). Kibra sub-county is mainly inhabited by the Luo, Luhya, Kisii,  
142 Kamba and Kikuyu ethnic communities (25,42). There are two major hospitals located  
143 within its environs (Mbagathi Sub-County Referral Hospital and Kenyatta National  
144 Hospital). The area is also served by several other smaller government, private and non-  
145 government organizations (NGO) health centres, dispensaries, clinics, and nursing  
146 homes.

147  
148 Mathare is the second largest informal settlement in Nairobi after Kibera (45) and is also  
149 a sub-county. It is located northeast of the Nairobi CBD and has 16 villages in total as  
150 indicated in figure 3. Mathare sub-county is mainly inhabited by the Luo, Luhya, Kikuyu,  
151 Kisii, and Kamba ethnic communities (42). Like Kibera, Mathare is also located near a  
152 major government health facility (Mathare Mental National Referral Hospital). The area is  
153 also served by several smaller government, private and national and international NGO  
154 health facilities.

155

156 **Fig. 2 Map of Kibera urban informal settlement**, adapted from Mutisya et al., 2011 (43)

157

158 **Fig. 3 Map of Mathare urban informal settlement**, adapted from UN-Habitat., 2020 (45)

159

160



161 *Data collection and analysis*

162 Data was collected using key informant interviews (KIIs) and focus group discussions  
163 (FGDs). KIIs (involving two sub-county coordinators and one CHA) were conducted in  
164 English, whereas the FGDs (involving the rest of the participants) were conducted in both  
165 Kiswahili and English. All discussions were audio-recorded and thereafter transcribed  
166 verbatim and translated where needed. The lead author verified all the translated  
167 transcripts. During the transcription and translation process, the lead author also  
168 counterchecked several randomly selected transcripts against the raw audio recordings;  
169 to check for accuracy and quality.

170 Following every FGD, the first and second author who collected the data had a debrief  
171 session where they developed detailed summary sheets, and discussed any pertinent  
172 issues or dilemmas emerging from the field; including those that needed to be taken into  
173 account for subsequent FGDs. The last author also joined most of these debrief sessions.  
174 In addition, the lead author developed detailed summary sheets after every KII. These  
175 summary sheets were used to help manage the data, as well as to keep whole the 'story'  
176 from each FGD or KII, prior to the process of splitting the data into themes (coding).  
177 Following this, the data were analysed using a framework analysis approach (46). This  
178 involved: extensive familiarization with the data ('immersion' in the data) by reading and  
179 re-reading of transcripts, listening to audio-recordings, and re-reading the developed  
180 summary sheets; consultatively developing a coding framework based on the study  
181 objectives and preliminary emergent themes; and coding the entire dataset using NVivo  
182 software, to search for further emergent themes. Comparison charts were thereafter  
183 developed to identify patterns and explore relationships between the different factors that

184 influenced the performance of CHVs. The lead author also kept a reflective journal where  
185 he documented events both during and after field visits. In this journal the author reflected  
186 on how his own beliefs and assumptions might have influenced data collection, analysis  
187 and interpretation; and noted down emerging dilemmas and potential solutions.

188 Ethical approval to conduct this study was obtained from the KEMRI Scientific and Ethical  
189 Review Unit (KEMRI/SERU/CGMR-C/228/4190). Written informed consent was obtained  
190 from all participants prior to data collection. The different dates for recruiting the different  
191 study participants are indicated in the table below.

| <b>Group of participants</b>          | <b>Date of recruitment</b> |
|---------------------------------------|----------------------------|
| Kibera Male CHV FGD groups 1 and 2    | 23/08/2021                 |
| Kibera Female CHV FGD groups 1 and 2  | 24/08/2021                 |
| Kibera CHC FGD groups 1 and 2         | 08/09/2021                 |
| Kibera CHAs FGD                       | 10/09/2021                 |
| Mathare Male CHV FGD groups 1 and 2   | 23/09/2021                 |
| Mathare Female CHV FGD groups 1 and 2 | 25/09/2021                 |
| Mathare CHC FGD groups 1 and 2        | 13/10/2021                 |
| Mathare CHA KII                       | 15/10/2021                 |
| Mathare sub-county coordinator KII    | 15/10/2021                 |
| Kibera sub-county coordinator KII     | 01/04/2022                 |

192

193

194

195 **Results**

196 This section begins by presenting the general characteristics of the study participants,  
 197 followed by the factors that influenced the CHVs’ performance as outlined in the Kok.*et*  
 198 *al.*, (2015) framework.

199 **General characteristics of study participants**

200 The study involved 126 participants, including two sub-county officials, 14 community  
 201 health assistants, 77 CHVs and 33 community health committee (CHC) representatives.  
 202 The participants varied in age ranging from 22 to 63 years old. Of the 77 CHVs, 16 had  
 203 primary school education, 34 secondary school education, and 27 had tertiary level  
 204 education (24 diploma and three university level education). Length of service varied from  
 205 one year to as many as 25 years in service. Table 1 below gives additional information  
 206 on the study participants’ characteristics.

207 **Table 1: Characteristics of study participants**

| Category of participants           | No. of participants | Age - range  | Level of education                                              | Length of time in service |         |                                                                 |              |
|------------------------------------|---------------------|--------------|-----------------------------------------------------------------|---------------------------|---------|-----------------------------------------------------------------|--------------|
| <b>CHS sub-county coordinators</b> | 2                   | 24 - 49      | -                                                               | 2 – 3 years               |         |                                                                 |              |
| <b>CHAs</b>                        | 14                  |              | -                                                               | 7 months – 11 years       |         |                                                                 |              |
| <b>CHVs</b>                        | 77                  | 22 - 62      | Primary (6)<br>Secondary (12)<br>Diploma (19)<br>University (1) | 2 – 16 years              |         |                                                                 |              |
| Male                               | 38                  |              |                                                                 |                           |         |                                                                 |              |
| Female                             | 39                  |              |                                                                 |                           | 24 - 57 | Primary (10)<br>Secondary (22)<br>Diploma (5)<br>University (2) |              |
|                                    |                     |              |                                                                 |                           |         |                                                                 | 1 – 25 years |
|                                    |                     |              |                                                                 |                           |         |                                                                 |              |
|                                    |                     | 1 – 25 years |                                                                 |                           |         |                                                                 |              |
| <b>CHC representatives</b>         | 33                  | 30 - 63      | -                                                               | 1 – 20 years              |         |                                                                 |              |

208

## 209 **Programme design factors**

210 As earlier described, for this study, the Kenya CHS was the programme or intervention  
211 under consideration, and the factors described below are related to its implementation. In  
212 this context, the programme design factors that were observed as being important and  
213 impacting on CHV performance included CHV recruitment/selection, training, supportive  
214 supervision, supplies & resources, and CHV remuneration. Each of these are discussed  
215 in turn below.

### 216 *CHV recruitment*

217 CHV recruitment was done through Community Health Committees (CHC), especially  
218 when forming new Community Health Units (CHU). Both CHCs and CHUs are described  
219 elsewhere – see details under supplementary information. The CHV positions were  
220 advertised in the community by word of mouth and through public meetings (*barazas*)  
221 and those interested applied through the local administration office. The area chiefs who  
222 are also members of the CHC, then called for a *baraza* where the applicants were vetted.  
223 According to the respondents and as illustrated below, for one to qualify to be a CHV,  
224 they had to be at least 18 years of age, be a good role model in the community, be willing  
225 to volunteer, be a resident of the local area, and know how to read and write as illustrated  
226 below.

227 *“...CHVs are recruited in a chief’s baraza... the first step during recruitment is normally to*  
228 *come up with the Community Health Committee... and thereafter the CHV positions are*  
229 *advertised... and any person interested in the position is asked to come to the baraza.*  
230 *Once the baraza is called, the Community Health Committee members are then given the*  
231 *qualifications... like one, the CHVs must be 18 years and above...be role models...be*

232 *able to read and write because there are reports that are going to be required. The other*  
233 *thing is that they must be willing to volunteer their services...the community members are*  
234 *also involved in the vetting process because we'll ask them whether they approve of them*  
235 *[the CHVs] or not. So, it is done in such a way that all villages are represented..."* (sub-  
236 county official)

237 The voluntary nature of the CHV positions had a negative impact on the recruitment  
238 exercise since only those who had freshly graduated from secondary school applied; and  
239 thereafter dropped out of the CHV role once they secured paid opportunities. In other  
240 words, many viewed the role as a stopgap measure while they searched for paid  
241 employment. Consequently, the CHC members recommended the CHV positions to  
242 community members who were personally known to them, as opposed to publicly  
243 advertising the positions.

#### 244 *CHV training*

245 All CHVs were supposed to receive two types of training, basic and technical training.  
246 According to the participants, the basic training focused on the Kenya CHS and  
247 highlighted the roles and responsibilities of the CHVs. Whereas the technical training  
248 comprised of technical modules such as integrated community case management, and  
249 water and sanitation. Majority of the CHVs reported receiving only basic CHV training  
250 upon being recruited. This was because the technical training was offered by various non-  
251 governmental partners and was dependent on the project goals of implementing partners.  
252 This also meant that the CHVs who received technical training were those situated in the  
253 localities where programs were being implemented by the non-governmental partners (in  
254 turn disadvantaging those from other areas). Other factors that were considered in

255 selecting CHVs for technical training included; number of slots available for a particular  
256 training, CHV's level of activeness, ensuring there was rotation in who was selected for  
257 training , ability of a CHV, and personal preference by Community Health Unit leaders.

258 Furthermore, since the CHVs were not remunerated for their work and to help keep them  
259 accountable for their performance, the trainings were sometimes used to 'reward' those  
260 CHVs considered to be active in the community as explained below by a CHU leader.

261 *"...I do select [people for training]. I am the chairman of a CHU...mostly those who are*  
262 *picked for trainings are those seen to be active. Since there are others who if you ask*  
263 *them to bring their reports ... they will give you like 10 excuses [why they can't]. So, I*  
264 *cannot call a person like that for a training or even an activity..."* (Male CHV, unit leader).

265 Most of the CHVs felt that the trainings empowered them with basic knowledge and skills  
266 to perform their roles confidently. The technical training also brought change of attitude  
267 among the CHVs, with for example, some male CHVs becoming more empathetic as  
268 highlighted below.

269 *"I [previously] didn't care about the community. But after I got the training, it changed my*  
270 *attitude and I started to appreciate other people...I now feel for others and whenever I*  
271 *meet a sick person, I try to assist and even give a referral in case one is needed."* (Male  
272 CHV, Kibra)

273 Despite their positive impact, the trainings were sometimes used to 'punish' those CHVs  
274 who were viewed as inciters, for example those who asked for better working conditions.  
275 This in turn resulted in affected CHVs becoming demotivated and preferring to engage in  
276 private income generating activities to provide for their families. Selection for technical

277 training was also linked to potential favoritism, which led to CHV demotivation as  
278 illustrated in the quote below.

279 *“...Sometimes when trainings come, some people will go for more trainings and others*  
280 *are left out. So, it seems like the training is reserved for the ‘chosen few’...the unit leaders*  
281 *pick those who are close to them and at times you hear of cases of bribery...”* (Male CHV  
282 - Kibra)

### 283 *CHV supervision and support*

284 As earlier described, in the Kenyan context, CHVs are supervised by government  
285 employed community health assistants (CHAs). The key challenges reported by the  
286 CHAs as negatively impacting their ability to offer supportive supervision to CHVs  
287 included lack of resources such as transport to facilitate movement within the community  
288 especially where there were large areas to cover; and phone airtime for communication.  
289 The CHAs were also significantly understaffed which led to increased workloads.  
290 Furthermore, one sub-county official explained that recently recruited CHAs had not been  
291 adequately trained on the roles of the frontline CHVs, and as such could not offer  
292 adequate supervision to the CHVs. Importantly, as illustrated below, the CHAs found it  
293 difficult to hold CHVs accountable for expected work, since the role was voluntary, and  
294 one could therefore not require them to undertake work.

295 *“...the challenge is that CHVs are not given a stipend by the county government, and you*  
296 *see the [implementation] partners cannot give all the CHVs stipends. So, you find some*  
297 *[who are involved in implementation projects], receive stipends while others do not. So,*  
298 *for the ones who are getting, they will really work ... they will give you reports. And it*

299 *becomes easy for accountability purposes, to tag them, onto that stipend... But for those*  
300 *ones who are not getting any stipends, it's very challenging because for some months*  
301 *they will bring their reports, while for other months they will not. And since you're not*  
302 *giving them anything, you cannot hold them accountable and ask them for reports. So, I*  
303 *think that is the biggest challenge..."* (Sub-county official)

304 Some of the younger CHAs also found it difficult to supervise CHVs who were older than  
305 them, sometimes of the same age as their parents. This was also context-dependent  
306 given the prevailing societal norms of showing respect and reverence to one's elders.  
307 Nonetheless, one respondent, a sub-county official, held a differing opinion. According to  
308 them, the relationship between young CHAs and the more senior CHVs was not  
309 dependent on age, but rather the nature of relationship and interaction between the two  
310 groups. That is whenever, the younger CHAs treated the senior CHVs with respect then  
311 the respect will be reciprocated back.

### 312 *Supplies and resources*

313 All the participants reported infrequent provision of resources and supplies as a key factor  
314 affecting CHV performance. Areas that had ongoing projects implemented by non-  
315 governmental partners regularly received necessary resources, whereas other areas did  
316 not, which also highlights an issue around (in)equity in resource distribution based on  
317 locality and presence of well-resourced partners. The most commonly mentioned  
318 resources and supplies that the CHVs lacked and which impacted on their ability to  
319 adequately undertake their roles included; reporting booklets, identification documents  
320 (badges and/or branded t-shirts), gloves, masks and sanitizers (especially in the context



321 of the COVID-19 pandemic), gumboots and raincoats for the rainy season, and medical  
322 cover.

323 The lack of reporting booklets meant that CHVs often used their own money to photocopy  
324 required documents to enable reporting. An important finding given the general low socio-  
325 economic status of the study communities of which the CHVs were part of. On the other  
326 hand, lack of identification materials made working in some circumstances especially  
327 difficult. For example, at the height of the COVID-19 pandemic, the Government of Kenya  
328 instituted a dusk to dawn curfew amongst other restrictions. This meant that CHVs could  
329 not offer their services during curfew hours, even in the event of an emergency, as they  
330 risk being jailed or fined if found outside. Similarly, it made it challenging for CHVs to be  
331 prioritized to receive the first round of the COVID-19 vaccine; as they were not considered  
332 to be essential workers. The lack of identification also made first-time entry into new  
333 households difficult, especially in the context of heightened insecurity in the study  
334 communities, sometimes exposing the CHVs to risk of violence from household members.  
335 In particular, household members were sometimes suspicious of new, young, male CHVs  
336 who were perceived to be spies for thieves in the neighborhood. The quote below  
337 illustrates this concern.

338 *“...Those who primarily undergo these challenges are the youthful male CHVs. They are*  
339 *not allowed to go into peoples’ houses because of the belief that they are there to spy for*  
340 *the various gangs in the neighbourhood, and then come back later in the night to steal.”*

341 (Male CHC representative - Kibera)

342 Lack of personal protective equipment such as gloves, masks and sanitizers was reported  
343 by many respondents as exposing CHVs to risk of infection when conducting household

344 visits, especially during the pandemic period. The CHVs also stated feeling demotivated  
345 to continue working during this period due to fear of falling sick, exacerbated by a lack of  
346 medical cover and thus not being able to meet hospital costs in case of hospitalization.

347 *“...one cannot go and sensitize households about proper ways to wear a mask, practice*  
348 *handwashing and things like that; and in case you fall sick there is no one to turn to...it’s*  
349 *you to sort yourself out...and you know how expensive it is to treat COVID-19 especially*  
350 *when admitted in the ICU.”* (Female CHV, Mathare)

#### 351 *Remuneration of CHVs (Financial and non-financial incentives)*

352 Given the voluntary nature of the job, CHVs were not always present to carry out their  
353 duties as assigned by the CHAs. Since they also needed paid jobs, to provide for their  
354 families as outlined below by a CHA.

355 *“...Whenever I plan to do an activity with the CHVs in the community, I normally call like*  
356 *10 CHVs, and book appointments with them. But at the end of the day, I will only get*  
357 *maybe two or three CHVs...Others will ask whether you will compensate them for their*  
358 *time since they have to go out and look for paid jobs...”* (CHA, Mathare)

359 CHVs depended on stipend from NGO trainings & activities to provide for their families.  
360 However, the long turn-around payment time demotivated them. According to the county  
361 officials CHVs who were called for training/activities with stipend were more active than  
362 those called for trainings/activities with no stipend.

363 Despite the work-related challenges that the CHVs faced, they drew motivation to  
364 continue with the work from the appreciation, respect, and recognition that they got from  
365 the community. Community members referred to some of the CHVs as doctors, teachers,

366 and good Samaritans. As a result of this respect and recognition, some of the community  
367 members visited the CHVs for solutions to the different challenges that they experienced,  
368 as shown in the quote below.

369 *“...What makes me proud to be a CHV is the respect and recognition I get from the*  
370 *community...you find that when something is wrong in the community, let’s say a child is*  
371 *sick or has refused to go to school, or there are couples fighting, you will be the first*  
372 *person to be consulted by the women in the community...”* (Female CHV, Mathare)

373

### 374 **Health system factors**

375 One of the key roles of CHVs in the Kenyan context is to act as a link between the  
376 community and the formal health system. A sub-optimal health system and challenges  
377 experienced in health facilities by community members, led to loss of community trust in  
378 CHVs and made it difficult for them to refer community members to local public health  
379 facilities. Some of the key health systems related challenges included poor interactions  
380 between healthcare workers and community members at the local referral facilities,  
381 unavailability of services, perceived corruption within health facilities, and issues related  
382 to referral outside of the CHVs’ local health facilities. All of these resulted in an erosion of  
383 community trust in the CHVs as described in detail below.

384 Most Community Health Committee representatives and CHVs stated that some  
385 healthcare workers in public health facilities were rude to patients, resulting in a  
386 preference for local private clinics and dispensaries. These sub-optimal interactions  
387 between patients and healthcare workers made it difficult for CHVs to refer community

388 members to local public health facilities where they had appropriate linkages as illustrated  
389 in the quote below.

390 *“...We [CHVs] are supposed to link our clients to government facilities but you find that*  
391 *those in the community prefer going to private facilities, since those [healthcare workers]*  
392 *in government facilities are rude. At times [the patients] go to a public facility with referral*  
393 *letters from a CHV, but the kind of response they will receive...will make them not to go*  
394 *back there...”* (Male CHV, Kibera)

395 Service unavailability was another health system challenge that impacted on CHVs’ ability  
396 to perform their roles. For example, most of the government health facilities that were  
397 supposed to operate 24-hours a day, did not have operational laboratory and pharmacy  
398 services at night. This meant that community members who were referred to these  
399 facilities after-hours, had to return the following day for the additional services, causing  
400 inconvenience. This in turn led to a loss of community trust in the CHVs who had made  
401 the referral in the first place, as seen in the quote below.

402 *“The [public] hospitals now work for 24 hours. However, when you refer a patient at night,*  
403 *they will see the doctor but be told to come back the following day for tests and medicine*  
404 *since both the laboratory and the pharmacy are closed for the day. So, the referred*  
405 *patients feel they wasted their time coming to the hospital at night, since they will need to*  
406 *come back the following day for the same service. The community members also think*  
407 *we are in business with the hospital and that we are paid for the referrals...whereas all*  
408 *we are doing is voluntary...”* (Female CHV, Mathare)

409 Another factor that impeded CHVs from optimally undertaking their roles was perceived  
410 and actual corruption within the health system. Many CHVs alleged that referred patients  
411 paid for goods and services that were supposed to be free at the local public health  
412 facilities. These included the child wellness (immunization) booklet and maternity  
413 services. The payment for free goods and services in turn led to loss of community trust  
414 in the CHVs since the referred patients believed that some of the CHVs were working  
415 with corrupt healthcare workers to steal from them. The CHVs also stated that - rather  
416 than treat patients at the public facilities which were either free or highly subsidized -  
417 some health facility staff allegedly referred community members to private facilities and  
418 pharmacies which were owned by the health workers themselves. Thus, the healthcare  
419 worker benefitted financially, while the patient incurred an unnecessary out of pocket  
420 expense. The illustrative quote below highlights the sale of goods and services that are  
421 ideally supposed to be free, and how this in turn impacts on community trust in CHVs.

422 *“If it wasn’t for us, these facilities would not have patients...we normally go out*  
423 *campaigning...asking patients to come for free services in government facilities then*  
424 *when they come, they are asked to pay for goods & services that are supposed to be*  
425 *free. For example, expectant mothers are sold for child welfare [immunization]*  
426 *booklets...which cost 200 shillings each... We don’t understand why the booklets are sold*  
427 *while on the back cover it’s indicated ‘Not for sale, Government of Kenya’...this makes*  
428 *the community think that we are working with the facility [health workers] to steal from*  
429 *them (Female CHV, Mathare)*

430 Many of the CHVs were unclear about where their role ended when it came to referrals.  
431 For example, it was not clear whether they were required to escort patients to the facility

432 upon referral. Sometimes they escorted patients to facilities outside of their locality where  
433 they were unknown by the healthcare workers and ended up experiencing extensive  
434 waiting times due to long queues. This in turn demotivated them, and especially given the  
435 voluntary nature of the role. Additionally, their referral letters were often not recognized in  
436 these facilities outside of their locality; and they were sometimes made to pay for the  
437 treatment of the escorted patient as they were perceived to be relatives. All these in turn  
438 adversely impacted on CHVs' ability and willingness to undertake their role of referring  
439 patients as illustrated below.

440 *“If you accompany a patient to a hospital like Kenyatta [national referral hospital] or send*  
441 *a patient with a referral letter, the healthcare workers there do not recognize the referral*  
442 *letter or even you as the CHV...You will queue with the patient the whole day...they will*  
443 *not recognize that you are a CHV...[it is demotivating]”* (Female CHV, Kibera)

#### 444 **Broader contextual factors**

445 The major broader contextual factors reported to negatively impact on CHVs'  
446 performance and motivation were; demand for financial or material support from  
447 community members, perceived corruption in community programmes; and insecurity.

448 Despite the CHV role being voluntary, some community members perceived CHVs to be  
449 government-salaried employees, who benefited from collecting their (household) data.  
450 This perception led to CHVs receiving financial and material requests from community  
451 members when they visited needy households for data collection. As illustrated below, if  
452 they failed to grant these requests, the concern households became uncooperative, which  
453 in turn made the work very difficult and demotivating for CHVs.

454 “...at times you may visit a household and find the inhabitants helpless [very  
455 impoverished] ... You'll find they've had nothing to eat. So, if you visit them today and  
456 give them fifty shillings, they will expect you to do the same the next time you visit. And  
457 this problem is not only with one household, you might find that there are even 10  
458 households. So, when you visit and tell them that today you have nothing to give, they  
459 become uncooperative and start to insult you... At times, you would like to go visit the  
460 households but get discouraged since you are there as a volunteer, but the community  
461 thinks that you are being paid for the work you are doing.” (Female CHV, Mathare)

462 Perceived corruption in community programs also adversely impacted CHVs' motivation  
463 and ability to undertake their roles. For example, at the onset of the COVID-19 pandemic,  
464 both government and NGOs listed households within the UIS for social support  
465 programmes such as cash transfers. However, according to most respondents, the  
466 intended beneficiaries never received the payments or material benefits. Since the CHVs  
467 had undertaken the household registration exercise, it was assumed that they had  
468 benefitted from the programmes at the expense of the community members. This resulted  
469 in reputational damage for the CHVs and a loss of community trust in them as illustrated  
470 below.

471 “...We faced many challenges during the COVID-19 period... You [CHV] are told to write  
472 down names [households], which you do and submit [to the relevant authorities]. But the  
473 community members do not benefit thereafter. This has made the community  
474 unresponsive and if you now visit households for reports, they refuse to cooperate & tell  
475 you that, “you have used our names a lot & it's you who is benefiting”... This has ruined  
476 our name...” (Female CHV, Mathare).

477 Urban informal settlements are generally characterized by high levels of insecurity that  
478 can potentially compromise personal safety. This was similarly the case for the study  
479 communities, with respondents stating that the situation was exacerbated by widespread  
480 drug use and high levels of unemployment in these contexts. Given this high-risk context  
481 that the CHVs worked in, they were constantly at risk of being robbed and having their  
482 valuables stolen while undertaking their official roles such as household visits. The female  
483 CHVs in particular, were also at risk of being raped and sexually assaulted, especially  
484 when working with youths who were drug users; presenting a specific gendered  
485 challenge. This emergent theme of the ‘working environment’ and especially concerns  
486 about personal safety is a unique challenge that is experienced by CHVs working in urban  
487 and peri-urban informal settlements and that has not been noted in the rural and nomadic  
488 contexts of Kenya.

489 *“...The are a lot of challenges [especially at night] ...I am a victim of that...there is a day*  
490 *I came across some thieves [as I was taking a patient to the health facility]. They took pity*  
491 *on me because I had a patient. But they robbed me of everything I had. For the patient,*  
492 *they only touched her inappropriately since she was too sick...if it wasn't for that, they*  
493 *could have raped her...”* (Male CHV, Mathare).

## 494 **Discussion**

495 This study explored factors that affect CHV performance in urban informal settlements  
496 within Nairobi Kenya and ways in which CHVs can be better supported to enhance their  
497 wellbeing and strengthen community strategies. The key programme design factors  
498 identified as influencing the performance of CHVs working in UIS included: CHV  
499 recruitment; training; the availability of supplies and resources; and the remuneration of



500 CHVs. Health system factors that influenced the CHVs performance included: the nature  
501 of relationship between healthcare workers at local referral facilities and community  
502 members; availability of services and perceived corruption at the referral facilities; and  
503 CHV referral outside of the local health facility. Broader contextual factors that affected  
504 CHV performance at the community level included: demand for material or financial  
505 support; perceived corruption in community programmes and neighbourhood insecurity.  
506 These are discussed in turn below with some suggested recommendations for tackling  
507 the issues.

508 The voluntary nature of the CHV position influenced the kind of CHVs who were recruited  
509 and their availability to carry out their duties as assigned by their supervisors. This mirrors  
510 findings from other contexts. For example, Sarma et al, George et al, Aseyo et al, and  
511 Osindo et al in their work conducted in Bangladesh, India, and Kenya respectively. In  
512 Sarma's work although conducted in a rural setting, the availability of paid assignments  
513 made it difficult for the BRAC's local office to find volunteer workers (47). Whereas, in  
514 George, Aseyo and Osindo's work, CHVs working in UIS found it difficult to devote time  
515 to voluntary work without any government allowances. This is because they faced  
516 additional pressure to provide for their families and therefore had to look for alternative  
517 sources of income. As such, some of them fitted their CHV-related tasks around normal  
518 daily income-generating activities (35,48,49).

519 In Bangladesh, Alam and others noted that a regular salary or income was critical to  
520 improving the CHVs' level of activity (50). Relatedly, to control for attrition, Bhutta et al.,  
521 recommend regular, performance-based financing (PBF) incentives or hiring CHVs as  
522 full-time waged employees (51). Nonetheless, given the significant resource and system

523 challenges experienced in settings such as Kenya, sustainability of such financial  
524 incentives are likely to face challenges, including irregular or insufficient disbursement of  
525 payments (1). Moreover, evidence from literature suggests that approaches like PBF  
526 incentives sometimes result in over reporting (52) or neglect of unpaid tasks by CHVs (2).  
527 Therefore, for such incentives to work, there is need for a mix of both financial and non-  
528 financial incentives, robust accountability measures, and a consideration of context. It is,  
529 however, noteworthy that Nairobi County, Kenya is in the process of establishing a  
530 performance-based incentive (PBI) for CHVs. Under this initiative, CHVs will be issued  
531 with a monthly stipend of 3,500 Kenya shillings of which 500 shillings will go towards their  
532 medical cover. These payments will be in exchange for eight days of work in a month and  
533 subject to the CHVs successfully achieving an 80 percent performance target (53). It  
534 remains to be seen how this approach will work. Further work is therefore needed to  
535 explore the effect of this PBI on the CHVs' motivation, job satisfaction, attrition, and  
536 performance.

537 Although money was noted as a key motivator for CHVs working in UIS in this study,  
538 other non-financial incentives were also observed to play an important role. In particular,  
539 CHV appreciation, respect and recognition were seen to be powerful motivators in  
540 continuity of the volunteer CHV role. This finding concurs with a review by Jaskiewicz et  
541 al., (54) and studies by George et al., Laston et al., and Alam et al (49,50,55,56). In their  
542 studies conducted in Ethiopia, Malawi, Zanzibar, Mozambique, Zambia, Nigeria, Burkina  
543 Faso, Iran, Pakistan, Nepal (54), India (49) and Bangladesh (50,55,56) these authors  
544 found that social prestige and positive community feedback to CHVs were important non-

545 financial factors associated with CHV activity; and should therefore be considered by  
546 programmes working in UIS.

547 As with the study conducted by Kok and colleagues (2), this study found that inconsistent  
548 CHV training; inadequate supportive supervision; and lack of, or insufficient, CHV  
549 resources and supplies negatively impacted CHV motivation and job satisfaction. This in  
550 turn adversely affected CHVs' wellbeing and performance. This finding concurs with that  
551 of several other authors that have conducted work in LMICs including Aseyo et al, George  
552 et al, Goudet et al, Kok and Muula, Karuga et al, Laston et al, Martinez et al, Osindo et  
553 al, Odhiambo et al, Sarma et al; and systematic reviews by Jaskiewicz et al and Kok et al  
554 (2,35,47–49,54,56–61). For example, Aseyo et al., George et al., and Sarma et al., found  
555 that inconsistent training left CHVs with knowledge gaps related to the technical aspects  
556 of their roles, thus compromising their credibility. This was especially evident when CHVs  
557 were not able to respond to (health and other) questions asked by community members  
558 (35,47,49).

559 As in this study, work conducted in other resource-poor settings also show that  
560 inadequate supportive supervision of CHVs and insufficient resources and supplies; have  
561 also been linked to loss of credibility and subsequent demotivation of CHVs resulting in  
562 poor performance (2,35,47,48,54,57,61,62). Previous work in Kenya by Karuga et al.,  
563 concurred with the findings of this study on the reasons for inadequate supportive  
564 supervision (61). Karuga et al found that the main reasons for insufficient supportive  
565 supervision were heavy workload on the part of supervisors, inadequate training by  
566 trainers who also act as supervisors, and inadequate resource inputs. According to  
567 Karuga et al., CHEWs supervised many CHVs, which affected their ability to provide

568 adequate regular supervision. Therefore, to boost CHV supervision in UIS, CHV  
569 programmes need to adopt an approach that takes into consideration the trainers'  
570 workload, the voluntary nature of the CHV position, and the limited resources in terms of  
571 operational support.

572 In this study, sub-optimal health systems and related challenges also contributed to loss  
573 of credibility for CHVs. This finding resonates with observations by George et al, Sarma  
574 et al and a systematic review by Jaskiewicz et al (47,49,54). According to Jaskiewicz and  
575 others for instance, community trust or respect was dependent on many factors within the  
576 community, with the health facility as an institution having a higher degree of influence  
577 (54). Both George et al., and Sarma and colleagues noted that community trust or respect  
578 was an important factor to the success of CHV programmes; and when compromised, it  
579 rendered CHVs ineffective. As in this study, George, Sarma and colleagues, and the  
580 systematic review by Jaskiewicz and others found that sub-optimal healthcare worker-  
581 community members interactions, drug stockouts, service unavailability, and perceived  
582 corruption in referral facilities; led to loss of community trust in the CHVs. This in turn  
583 resulted in a preference by community members for private clinics over government  
584 facilities; and subsequently demotivated CHVs since they were evaluated based on  
585 referrals made to public health (link) facilities (63,64).

586 Another health system challenge reported to demotivate and negatively affect CHV work  
587 was poor interactions between the CHVs themselves, and referral facility healthcare  
588 workers. In this study, this was particularly prevalent when CHVs referred or accompanied  
589 community members outside of their usual locality due to lack of clarity on the CHV roles.  
590 According to Kok et al., attitude of healthcare workers towards CHVs had a major effect

591 on how they felt and performed (2). Negative attitudes from formal healthcare workers  
592 towards CHVs resulted in communication challenges, and adversely affected the  
593 community-health facility referral process (65). This suggests a need for awareness  
594 raising amongst relevant stakeholders to appreciate the role played by all cadres within  
595 the health system, clarity of roles and remit for CHVs, and potentially also communication  
596 training for formal healthcare workers to improve interactions with both community  
597 members and CHVs.

598 In this study, the demand for financial or material support, perceived corruption in  
599 community programmes, and insecurity hampered CHVs' service delivery to those living  
600 in UIS. These mirror findings from earlier studies conducted in Nairobi and other Kenyan  
601 counties by Aseyo et al., Osindo et al., and Odhiambo and colleagues (35,48,58). In these  
602 studies, the community expected tangible support from the CHVs. As such, out of  
603 sympathy, some of the CHVs used their own financial resources to provide this support  
604 to community members, which also led to community acceptance of them. Those CHVs  
605 who were unable to meet such demands lost favour especially with needy households,  
606 resulting in CHV dropout. This emphasizes the need for clarity of roles including  
607 community sensitization of the same (2). This also suggests a need to integrate CHV  
608 activities with government social support programmes, that provide assistance to the very  
609 needy and shield CHVs from unrealistic and unfeasible community demands. Such social  
610 support programs would, however, require proper monitoring and accountability checks  
611 to ensure that only genuinely needy community members benefit.

612 Safety of CHVs especially at night was also noted to be of concern in this study. Indeed,  
613 this particular finding seems to be of greater significance in urban informal settlements

614 (including in Kenya) compared to rural and peri-urban contexts. For example, reviews by  
615 Glenton et al., and Ogutu et al., (22,66) showed that safety among CHVs working in UIS  
616 was of great concern especially due to high poverty levels in these settings, and other  
617 social challenges including criminal activities in the local areas. In Brazil for example,  
618 CHVs lived and worked in dangerous neighbourhoods with high criminal activities such  
619 as prostitution, drug use and violence. Because of this, they felt insecure working in such  
620 neighbourhoods for fear of being victims of aggression (67). In previous Kenyan studies  
621 it was noted that insecurity hampered the CHVs' access to certain neighbourhoods or  
622 working late in the evenings consequently blocking CHVs from reaching their full potential  
623 (48,58). It is therefore pertinent to boost safety and security measures in settings such as  
624 where this study took place. These initiatives can include: providing robust and corrupt-  
625 free national and local community policing including responsive emergency hotlines as  
626 needed; provision of adequate ambulatory services to avoid CHVs having to accompany  
627 community members to facilities at night while on foot or motorbikes; tackling social  
628 challenges such as high unemployment and drug and alcohol abuse that contribute to  
629 crime; ensuring proper and adequate amenities such as local street lighting and good  
630 road networks are provided by the relevant national and sub-national authorities; and  
631 maintenance of relevant infrastructure. These efforts would require intersectoral and  
632 intergovernmental cooperation with both the national and county governments playing a  
633 role supported by relevant private and NGO stakeholders.

### 634 **Limitations of the study**

635 One key limitation of this study was that it was conducted during a transition phase, when  
636 a new CHS (2020-2025) was being rolled out. At the time of conceptualizing the study,

637 this transition had not been anticipated. This meant that the research team had to take  
638 into consideration changes in both the new and outdated policy. To mitigate against this,  
639 the research team took this change into consideration when designing the data collection  
640 tools and factored in interview questions that referred to both the new and outdated  
641 policies during discussions.

642 Additionally, this study was conducted during the COVID-19 pandemic, and subsequently  
643 required adherence to COVID-19 safety protocols and restrictions. These always included  
644 social distancing and wearing facemasks which was challenging given the study contexts  
645 i.e. urban informal settlements. These COVID-19 safety protocols potentially also affected  
646 the quality of audio-recordings, especially where the background environments were  
647 noisy (given that respondents had to be masked and sit far apart from each other). To  
648 mitigate against this challenge, the research team did two interviews for each category of  
649 participants. The research team also asked the participants to raise their voices while  
650 speaking, and where necessary - especially for soft-spoken participants – to lower their  
651 masks only while speaking for audibility. For the soft-spoken participants the interview  
652 moderator also repeated their responses to enable capturing by the audio-recorder and  
653 to facilitate discussion and responses from others present. The research team also did a  
654 thorough quality check of the transcripts as explained in the data analysis section above.

655

## 656 **Conclusion**

657 Like in other settings such as the rural and peri-urban settings, community health  
658 volunteers working in UIS in Kenya face a myriad of challenges that impact on their  
659 wellbeing and work performance. These cadre of health workers can be better supported

660 by being financially remunerated in addition to other non-financial incentives. Other  
661 programme design requirements that are vital for CHVs' wellbeing include timely holistic  
662 training, adequate supportive supervision and sufficient resources and supplies to  
663 undertake their job roles. Additionally, there is need for clarity of roles and scope of work,  
664 training of healthcare workers on appropriate relations with both the community and  
665 CHVs, ensuring availability of services, and putting strategies in place to safeguard  
666 against corrupt practices in public health facilities and community programs. In addition,  
667 specifically for the urban poor context, there is an urgent need for improved and adequate  
668 security measures at the community level, to ensure safety of the CHVs as they undertake  
669 their roles.

## 670 **Abbreviations**

671 CHS – Community Health Strategy; CHV - Community health volunteer; CHC -  
672 Community health committee; CHU - Community health unit; CHA - Community health  
673 assistant; CHEW - Community health extension worker; LMIC - Low-and middle-income  
674 country; NGO - Non-governmental organization; FGD - focus group discussion; KII - Key  
675 informant discussion.

## 676 **Acknowledgements**

677 We acknowledge immense support from the Ministry of Health and in particular the  
678 Division of Community Health Services. Special thanks to the Nairobi County CHS  
679 coordinator and both Mathare/Ruaraka and Lang'ata/Kibra sub-county CHS coordinators  
680 for facilitating our community entry and mobilization of both sub-county and community  
681 respondents. We also acknowledge the continual support of the Nairobi County



682 Department of Health, and all the study participants for giving their time during the study  
683 period.

#### 684 **Authors Contributions**

685 Michael Ogutu (MO), Timothy Abuya (TA) and Kui Muraya (KM) conceptualized and  
686 designed the study. MO with support from KM developed the data collection tools, led the  
687 data collection, cleaning and analysis; and drafted the initial manuscript. Erick Kamui (EK)  
688 assisted with the data collection and preliminary analysis. KM supported and gave overall  
689 guidance on both the data collection and analysis. All authors reviewed the manuscript  
690 and gave critical feedback that contributed to its revision. All the authors read and  
691 approved the final manuscript.

#### 692 **Funding**

693 This work was jointly funded by The Wellcome Trust and the Department of Health and  
694 Social Care (DHSC), through the National Institute for Health Research (NIHR) using the  
695 UK's Official Development Assistance (ODA) Funding, under Grant Reference No  
696 218348/Z/19/Z.

#### 697 **Declarations**

#### 698 **Consent for publication**

699 This paper is published with the permission of the Director, Kenya Medical Research  
700 Institute (KEMRI).

#### 701 **Competing interests**

702 The authors declare that they have no competing interests.

703

704

705

706

707

708

## 709 REFERENCES

- 710 1. Lehmann U, Sanders D. Community health workers : What do we know about  
711 them? [Internet]. 2007 [cited 2019 Dec 14]. Available from:  
712 <https://www.hrhresourcecenter.org/node/1587.html>
- 713 2. Kok MC, Dieleman M, Taegtmeier M, Broerse JE, Kane SS, Ormel H, et al.  
714 Which intervention design factors influence performance of community health  
715 workers in low- and middle-income countries? A systematic review. *Health Policy*  
716 *Plan* [Internet]. 2014 Nov 1 [cited 2019 Apr 2];30(9):1207–27. Available from:  
717 <https://academic.oup.com/heapol/article-lookup/doi/10.1093/heapol/czu126>
- 718 3. Medhanyie A, Spigt M, Blanco R, Kifle Y, Berhane Y, Schaay N, et al. The role of  
719 health extension workers in improving utilization of maternal health services in  
720 rural areas in Ethiopia: a cross sectional study. *BMC Health Serv Res* [Internet].  
721 2012;12(1):1. Available from: *BMC Health Services Research*
- 722 4. Kimani-Murage EW, Norris SA, Mutua MK, Wekesah F, Wanjohi M, Muhia N, et  
723 al. Potential effectiveness of Community Health Strategy to promote exclusive  
724 breastfeeding in urban poor settings in Nairobi, Kenya: a quasi-experimental  
725 study. *J Dev Orig Health Dis* [Internet]. 2016;7(2):172–84. Available from:  
726 <https://doi.org/10.1017/S2040174415007941>
- 727 5. Baker-Henningham H, Powell C, Walker S, Grantham S. The effect of early  
728 stimulation on maternal depression: a cluster randomised controlled trial. *Arch Dis*  
729 *Child* [Internet]. 2005;90:1230–4. Available from: [www.archdischild.com](http://www.archdischild.com)
- 730 6. Badar S, Ali MBBS, Rahbar MH, Naeem S, Gul AŞ, Sanober Mubeen MACPŞ, et  
731 al. The Effectiveness of Counseling on Anxiety and Depression by Minimally  
732 Trained Counselors: A Randomized Controlled Trial. *Am J Psychother*.  
733 2003;57(3):324–36.
- 734 7. Sheth M, Obrah M. Diarrhea prevention through food safety education. *Indian J*  
735 *Pediatr* [Internet]. 2004;71(10):879–82. Available from:  
736 <https://doi.org/10.1007/BF02830824>
- 737 8. Nankunda J, Tumwine JK, Soltvedt Å, Semiyaga N, Ndeezi G, Tylleskär T.  
738 Community based peer counsellors for support of exclusive breastfeeding:  
739 Experiences from rural Uganda. *Int Breastfeed J* [Internet]. 2006 Oct 20 [cited  
740 2021 Feb 10];1(1):19. Available from:  
741 [http://internationalbreastfeedingjournal.biomedcentral.com/articles/10.1186/1746-](http://internationalbreastfeedingjournal.biomedcentral.com/articles/10.1186/1746-4358-1-19)  
742 [4358-1-19](http://internationalbreastfeedingjournal.biomedcentral.com/articles/10.1186/1746-4358-1-19)
- 743 9. Haider R, Ashworth A, Kabir I, Huttly SRA. Effect of community-based peer  
744 counsellors on exclusive breastfeeding practices in Dhaka, Bangladesh: A  
745 randomised controlled trial. *Lancet* [Internet]. 2000 Nov 11 [cited 2021 Feb  
746 10];356(9242):1643–7. Available from:  
747 <https://pubmed.ncbi.nlm.nih.gov/11089824/>
- 748 10. Scott VK, Gottschalk LB, Wright KQ, Twose C, Bohren MA, Schmitt ME, et al.  
749 Community Health Workers' Provision of Family Planning Services in Low- and

- 750 Middle-Income Countries: A Systematic Review of Effectiveness. *Stud Fam Plann*  
751 [Internet]. 2015 Sep 1 [cited 2021 Feb 10];46(3):241–61. Available from:  
752 <http://doi.wiley.com/10.1111/j.1728-4465.2015.00028.x>
- 753 11. Owais A, Hanif B, Siddiqui AR, Agha A, Zaidi AK. Does improving maternal  
754 knowledge of vaccines impact infant immunization rates? A community-based  
755 randomized-controlled trial in Karachi, Pakistan. *BMC Public Health* [Internet].  
756 2011 Dec 17 [cited 2021 Feb 10];11(1):239. Available from:  
757 <http://bmcpublihealth.biomedcentral.com/articles/10.1186/1471-2458-11-239>
- 758 12. Miller NP, Milsom P, Johnson G, Bedford J, Simen Kapeu A, Oumar Diallo A, et  
759 al. Community health workers during the Ebola outbreak in Guinea, Liberia, and  
760 Sierra Leone. *J Glob Health* [Internet]. 2018 Dec [cited 2020 Dec 18];8(2).  
761 Available from: [www.jogh.org](http://www.jogh.org)
- 762 13. The Global Fund. In Kenya, A Chance to see Communities Confront COVID-19  
763 [Internet]. 2020 [cited 2020 Dec 21]. Available from:  
764 [https://www.theglobalfund.org/en/blog/2020-06-09-in-kenya-a-chance-to-see-](https://www.theglobalfund.org/en/blog/2020-06-09-in-kenya-a-chance-to-see-communities-confront-covid-19/)  
765 [communities-confront-covid-19/](https://www.theglobalfund.org/en/blog/2020-06-09-in-kenya-a-chance-to-see-communities-confront-covid-19/)
- 766 14. Kimani-Murage EW, Norris SA, Mutua MK, Wekesah F, Wanjohi M, Muhia N, et  
767 al. Potential effectiveness of Community Health Strategy to promote exclusive  
768 breastfeeding in urban poor settings in Nairobi, Kenya: A quasi-experimental  
769 study. *J Dev Orig Health Dis*. 2015;7(2):172–84.
- 770 15. Perry HB, Zulliger R, Rogers MM. Community Health Workers in Low-, Middle-,  
771 and High-Income Countries: An Overview of Their History, Recent Evolution, and  
772 Current Effectiveness. *Annu Rev Public Heal*. 2014;(35):399–421.
- 773 16. Amouzou A, Morris S, Moulton LH, Mukanga D. Assessing the impact of  
774 integrated community case management (iCCM) programs on child mortality:  
775 Review of early results and lessons learned in sub-Saharan Africa. *J Glob Health*.  
776 2015;4(2).
- 777 17. Mdege ND, Chindove S, Ali S. The effectiveness and cost implications of task-  
778 shifting in the delivery of antiretroviral therapy to HIV-infected patients: A  
779 systematic review. *Health Policy Plan*. 2013;28(3):223–36.
- 780 18. Owino Kaseje DC, Sempebwa EKN. An integrated rural health project in Saradidi,  
781 Kenya. *Soc Sci Med* [Internet]. 1989 Jan 1 [cited 2019 Apr 5];28(10):1063–71.  
782 Available from:  
783 [https://www.sciencedirect.com/science/article/abs/pii/0277953689903894?via%3](https://www.sciencedirect.com/science/article/abs/pii/0277953689903894?via%3Dihub)  
784 [Dihub](https://www.sciencedirect.com/science/article/abs/pii/0277953689903894?via%3Dihub)
- 785 19. Kok MC, Broerse JEW, Theobald S, Ormel H, Dieleman M, Taegtmeier M.  
786 Performance of community health workers: situating their intermediary position  
787 within complex adaptive health systems. *Hum Resour Health* [Internet]. 2017 Dec  
788 2 [cited 2019 Apr 11];15(1):59. Available from: [https://human-resources-](https://human-resources-health.biomedcentral.com/articles/10.1186/s12960-017-0234-z)  
789 [health.biomedcentral.com/articles/10.1186/s12960-017-0234-z](https://human-resources-health.biomedcentral.com/articles/10.1186/s12960-017-0234-z)
- 790 20. Kok MC. PERFORMANCE OF COMMUNITY HEALTH WORKERS Optimizing

- 791 the benefits of their unique position between communities and the health sector  
792 [Internet]. [Amsterdam]: VRIJE UNIVERSITEIT; 2015 [cited 2019 Apr 11].  
793 Available from: [http://www.chwcentral.org/sites/default/files/Kok 2015](http://www.chwcentral.org/sites/default/files/Kok%202015%20Performance%20of%20CHWs.pdf)  
794 [Performance of CHWs.pdf](http://www.chwcentral.org/sites/default/files/Kok 2015 Performance of CHWs.pdf)
- 795 21. Kok MC, Kane SS, Tulloch O, Ormel H, Theobald S, Dieleman M, et al. How does  
796 context influence performance of community health workers in low- and middle-  
797 income countries? Evidence from the literature. *Heal Res Policy Syst* [Internet].  
798 2015 Dec 7 [cited 2019 Apr 2];13(1):13. Available from: [https://health-policy-](https://health-policy-systems.biomedcentral.com/articles/10.1186/s12961-015-0001-3)  
799 [systems.biomedcentral.com/articles/10.1186/s12961-015-0001-3](https://health-policy-systems.biomedcentral.com/articles/10.1186/s12961-015-0001-3)
- 800 22. Ogutu M, Muraya K, Mockler D, Darker C. Factors influencing the performance of  
801 community health volunteers working within urban informal settlements in low-and  
802 middle-income countries: a qualitative meta-synthesis review. *Hum Resour Health*  
803 [Internet]. 2021 [cited 2021 Nov 29];19:144. Available from:  
804 <https://doi.org/10.1186/s12960-021-00691-z>
- 805 23. Participatory Slum Upgrading Programme. *SLUM ALMANAC 2015 2016*. UNON,  
806 Publishing Services Section, Nairobi, ISO 14001:2004-certified D1 No: 15-  
807 02822/200 copies/jw. 2016;98.
- 808 24. Ernst KC, Phillips BS, Duncan B “Duke.” Slums Are Not Places for Children to  
809 Live. *Adv Pediatr* [Internet]. 2013;60(1):53–87. Available from:  
810 <http://dx.doi.org/10.1016/j.yapd.2013.04.005>
- 811 25. Africa Population and Health Research Center (APHRC). *Population and Health*  
812 *Dynamics in Nairobi’s Informal Settlements: Report of the Nairobi Cross-sectional*  
813 *Slums Survey (NCSS) 2012* [Internet]. Nairobi; 2014 [cited 2019 Apr 11].  
814 Available from: [https://aphrc.org/wp-content/uploads/2014/08/NCSS2-FINAL-](https://aphrc.org/wp-content/uploads/2014/08/NCSS2-FINAL-Report.pdf)  
815 [Report.pdf](https://aphrc.org/wp-content/uploads/2014/08/NCSS2-FINAL-Report.pdf)
- 816 26. Beguy D, Elung’ata P, Mberu B, Oduor C, Wamukoya M, Nganyi B, et al. *HDSS*  
817 *Profile: The Nairobi Urban Health and Demographic Surveillance System*  
818 *(NUHDSS)*. *HDSS Profile Int J Epidemiol Adv Access* [Internet]. 2015 [cited 2019  
819 Apr 11];1–10. Available from: [https://www.indepth-](https://www.indepth-network.org/sites/default/files/content/centres/files/Nairobi%20Urban%20profile.pdf)  
820 [network.org/sites/default/files/content/centres/files/Nairobi Urban profile.pdf](https://www.indepth-network.org/sites/default/files/content/centres/files/Nairobi Urban profile.pdf)
- 821 27. Ezeh A, Oyebode O, Satterthwaite D, Chen Y-F, Ndugwa R, Sartori J, et al.  
822 *Series The health of people who live in slums 1 The history, geography, and*  
823 *sociology of slums and the health problems of people who live in slums*. 2016  
824 [cited 2019 Apr 11]; Available from: <http://dx.doi.org/10.1016/S0140-6736>
- 825 28. IRIN. *The silent crisis of the urban slums* [Internet]. 2013 [cited 2019 Mar 28].  
826 Available from: [https://www.unric.org/en/latest-un-buzz/28889-the-silent-crisis-of-](https://www.unric.org/en/latest-un-buzz/28889-the-silent-crisis-of-the-urban-slums)  
827 [the-urban-slums](https://www.unric.org/en/latest-un-buzz/28889-the-silent-crisis-of-the-urban-slums)
- 828 29. Ogutu M, Kamui E, Abuya T, Muraya K. *Implementation of the Kenya Community*  
829 *Health Strategy in urban informal settlements of Nairobi County in Kenya*. *Publ*.  
830 2023;
- 831 30. Ministry of Health. *Republic of Kenya Community Strategy Implementation*

- 832 Guidelines for Managers of the The Second NATIONAL HEALTH SECTOR  
833 Strategic Plan of Kenya [Internet]. 2007 [cited 2019 Mar 28]. Available from:  
834 [www.hsrs.health.go.ke](http://www.hsrs.health.go.ke)
- 835 31. Njoroge N. Five innovative UHC financing models. *Health Business*. 2019;6–8.
- 836 32. Ministry of Health. Strategic Plan of Kenya Taking the Kenya Essential Package  
837 for Health to the COMMUNITY A Strategy for the Delivery of Ministry of Health.  
838 2006;(June).
- 839 33. Ministry of Health. Kenya Community Health Policy 2020 - 2030. Nairobi; 2020.
- 840 34. Olayo R, Wafula C, Aseyo E, Loum C, Kaseje D. A quasi-experimental  
841 assessment of the effectiveness of the Community Health Strategy on health  
842 outcomes in Kenya. *BMC Health Serv Res* [Internet]. 2014 May 12 [cited 2019  
843 Apr 5];14(S1):S3. Available from:  
844 [https://bmchealthservres.biomedcentral.com/articles/10.1186/1472-6963-14-S1-](https://bmchealthservres.biomedcentral.com/articles/10.1186/1472-6963-14-S1-S3)  
845 [S3](https://bmchealthservres.biomedcentral.com/articles/10.1186/1472-6963-14-S1-S3)
- 846 35. Aseyo RE, Mumma J, Scott K, Nelima D, Davis E, Baker KK, et al. Realities and  
847 experiences of community health volunteers as agents for behaviour change:  
848 Evidence from an informal urban settlement in Kisumu, Kenya. *Hum Resour*  
849 *Health*. 2018;16(1):1–12.
- 850 36. Crispin N, Wamae A, Ndirangu M, Wamalwa D, Wangalwa G, Watako P, et al.  
851 Effects of Selected Socio-Demographic Characteristics of Community Health  
852 Workers on Performance of Home Visits during Pregnancy: A Cross-Sectional  
853 Study in Busia District, Kenya. *Glob J Health Sci* [Internet]. 2012 Jul 26 [cited  
854 2019 Apr 11];4(5):78–90. Available from:  
855 <http://www.ncbi.nlm.nih.gov/pubmed/22980380>
- 856 37. Olang’o CO, Nyamongo IK, Aagaard-Hansen J. Staff attrition among community  
857 health workers in home-based care programmes for people living with HIV and  
858 AIDS in western Kenya. *Health Policy (New York)* [Internet]. 2010 Oct [cited 2019  
859 Apr 11];97(2–3):232–7. Available from:  
860 <http://www.ncbi.nlm.nih.gov/pubmed/20807685>
- 861 38. Rowe SY, Kelly JM, Olewe MA, Kleinbaum DG, McGowan JE, McFarland DA, et  
862 al. Effect of multiple interventions on community health workers’ adherence to  
863 clinical guidelines in Siaya district, Kenya. *Trans R Soc Trop Med Hyg* [Internet].  
864 2007 Feb 1 [cited 2019 Apr 11];101(2):188–202. Available from:  
865 <https://www.sciencedirect.com/science/article/pii/S0035920306002628>
- 866 39. Rowe SY, Olewe MA, Kleinbaum DG, McGowan JE, McFarland DA, RoCHAT R, et  
867 al. Longitudinal analysis of community health workers’ adherence to treatment  
868 guidelines, Siaya, Kenya, 1997-2002. *Trop Med Int Heal* [Internet]. 2007 Mar 27  
869 [cited 2019 Apr 11];12(5):651–63. Available from:  
870 <http://doi.wiley.com/10.1111/j.1365-3156.2007.01824.x>
- 871 40. Takasugi T, Lee ACK. Why do community health workers volunteer? A qualitative  
872 study in Kenya. *Public Health* [Internet]. 2012 Oct 1 [cited 2019 Apr

- 873 11];126(10):839–45. Available from:  
874 <https://www.sciencedirect.com/science/article/pii/S0033350612002090>
- 875 41. Kawakatsu Y, Sugishita T, Kioko J, Ishimura A, Honda S. Factors influencing the  
876 performance of community health workers in Kisumu West, Kenya. *Prim Health*  
877 *Care Res Dev* [Internet]. 2012 Oct 11 [cited 2019 Mar 28];13(04):294–300.  
878 Available from: [http://www.journals.cambridge.org/abstract\\_S1463423612000138](http://www.journals.cambridge.org/abstract_S1463423612000138)
- 879 42. Kenya National Bureau of Statistics. VOLUME I: POPULATION BY COUNTY  
880 AND SUB-COUNTY [Internet]. Nairobi; 2019 [cited 2022 Mar 4]. Available from:  
881 <https://housingfinanceafrica.org/app/uploads/VOLUME-I-KPHC-2019.pdf>
- 882 43. Mutisya E, Yarime M. Understanding the Grassroots Dynamics of Slums in  
883 Nairobi: The Dilemma of Kibera Informal Settlements. *Int Trans J Eng Manag*  
884 *Appl Sci Technol* [Internet]. 2011 [cited 2022 Aug 31];2(2). Available from:  
885 [https://www.researchgate.net/publication/50392060\\_Understanding\\_the\\_Grassro](https://www.researchgate.net/publication/50392060_Understanding_the_Grassroots_Dynamics_of_Slums_in_Nairobi_The_Dilemma_of_Kibera_Informal_Settlements)  
886 [ots\\_Dynamics\\_of\\_Slums\\_in\\_Nairobi\\_The\\_Dilemma\\_of\\_Kibera\\_Informal\\_Settlem](https://www.researchgate.net/publication/50392060_Understanding_the_Grassro)  
887 [ents](https://www.researchgate.net/publication/50392060_Understanding_the_Grassro)
- 888 44. Trillo C, Makore CN. Kibera 2030 – Hope For Slums: Kibera 2030 [Internet]. 2021  
889 [cited 2022 Aug 23]. Available from: [https://hopeforslums.com/upgrading-kibera-](https://hopeforslums.com/upgrading-kibera-nairobi/)  
890 [nairobi/](https://hopeforslums.com/upgrading-kibera-nairobi/)
- 891 45. UN-Habitat. Informal settlements’ vulnerability mapping in Kenya - The Case of  
892 Mathare [Internet]. Nairobi; 2020. Available from:  
893 [https://unhabitat.org/sites/default/files/2021/08/the\\_case\\_of\\_kilifi\\_opt.pdf](https://unhabitat.org/sites/default/files/2021/08/the_case_of_kilifi_opt.pdf)
- 894 46. Gale NK, Heath G, Cameron E, Rashid S, Redwood S. Using the framework  
895 method for the analysis of qualitative data in multi-disciplinary health research.  
896 *BMC Med Res Methodol* [Internet]. 2013 [cited 2022 Jun 14];13(1):117. Available  
897 from: [/pmc/articles/PMC3848812/](https://pmc/articles/PMC3848812/)
- 898 47. Sarma HI, Jabeen I, Khan Luies S, Fakhar Uddin M, Ahmed T, Bossert TJ, et al.  
899 Performance of volunteer community health workers in implementing home-  
900 fortification interventions in Bangladesh: A qualitative investigation. *PLoS One*  
901 [Internet]. 2020; Available from: <https://doi.org/10.1371/journal.pone.0230709>
- 902 48. Osindo J, Bakibinga P, Ngomi N, Kamande E, Muriuki P, Kyobutungi C.  
903 Challenges and Opportunities for promoting Maternal, New born, and Child Health  
904 in urban informal settlements: perspectives of Community Health Volunteers in  
905 Nairobi, Kenya. *African Popul Stud*. 2016;30(3):3124–32.
- 906 49. George MS, Pant S, Devasenapathy N, Ghosh-Jerath S, Zodpey SP. Motivating  
907 and demotivating factors for community health workers: A qualitative study in  
908 urban slums of Delhi, India. *WHO South-East Asia J public Heal*. 2017;6(1):82–9.
- 909 50. Alam K, Tasneem S, Oliveras E. Performance of female volunteer community  
910 health workers in Dhaka urban slums. *Soc Sci Med* [Internet]. 2012;75(3):511–5.  
911 Available from: <http://dx.doi.org/10.1016/j.socscimed.2012.03.039>
- 912 51. Bhutta ZA, Lassi ZS, Pariyo G, Huicho L. Global Experience of Community Health

- 913 Workers for Delivery of Health Related Millennium Development Goals : Glob  
914 Heal Work Alliance/World Heal Organ. 2010;1–380.
- 915 52. Glenton C, Scheel IB, Pradhan S, Lewin S, Hodgins S, Shrestha V. The female  
916 community health volunteer programme in Nepal: Decision makers' perceptions of  
917 volunteerism, payment and other incentives. *Soc Sci Med* [Internet]. 2010 Jun 16  
918 [cited 2021 Apr 25];70(12):1920–7. Available from:  
919 <https://linkinghub.elsevier.com/retrieve/pii/S027795361000198X>
- 920 53. ARISE Consortium. Nairobi's CHVs to receive monthly stipend - Arise [Internet].  
921 2021 [cited 2022 Feb 28]. Available from:  
922 <https://www.ariseconsortium.org/nairobis-chvs-to-receive-monthly-stipend/>
- 923 54. Jaskiewicz W, Tulenko K. Increasing community health worker productivity and  
924 effectiveness: A review of the influence of the work environment. *Hum Resour*  
925 *Health*. 2012;10:1–9.
- 926 55. Alam K, Oliveras E. Retention of female volunteer community health workers in  
927 Dhaka urban slums: A prospective cohort study. *Hum Resour Health*. 2014 May  
928 20;12(1):1–11.
- 929 56. Laston SL, Hel Baqui A, Paljor N. Urban Volunteer Service in the Slums of Dhaka:  
930 Community and Volunteer Perceptions. Bangladesh; 1993. Report No.: Working  
931 Paper no. 41.
- 932 57. Martinez R, Vivancos R, Visschers B, Namatovu L, Nyangoma E, Walley J.  
933 Training needs, practices and barriers in the work of community reproductive  
934 health workers in Masindi district, Uganda. *Trop Doct*. 2008;38(2):93–5.
- 935 58. Odhiambo GO, Musuva RM, Odiere MR, Mwinzi PN. Experiences and  
936 perspectives of community health workers from implementing treatment for  
937 schistosomiasis using the community directed intervention strategy in an informal  
938 settlement in Kisumu City, western Kenya. *BMC Public Health* [Internet]. 2016  
939 Sep 15 [cited 2020 Apr 13];16(1):986. Available from:  
940 <http://bmcpublikealth.biomedcentral.com/articles/10.1186/s12889-016-3662-0>
- 941 59. Goudet S, Griffiths PL, Wainaina CW, Macharia TN, Wekesah FM, Wanjohi M, et  
942 al. Social value of a nutritional counselling and support program for breastfeeding  
943 in urban poor settings, Nairobi. *BMC Public Health* [Internet]. 2018;18(1):424.  
944 Available from:  
945 <http://ovidsp.ovid.com/ovidweb.cgi?T=JS&PAGE=reference&D=med15&NEWS=N&AN=29606106>  
946
- 947 60. Kok MC, Muula A. Motivation and job satisfaction of Health Surveillance  
948 Assistants in Mwanza, Malawi: an explorative study. *Malawi Med J*. 2013;25(1):5–  
949 11.
- 950 61. Karuga RN, Mireku M, Muturi N, McCollum R, Vallieres F, Kumar M, et al.  
951 Supportive supervision of close-to-community providers of health care: Findings  
952 from action research conducted in two counties in Kenya. *PLoS One* [Internet].  
953 2019;14(5):1–19. Available from: <http://dx.doi.org/10.1371/journal.pone.0216444>



- 954 62. Ndimba SD, Sidat M, Give C, Ormel H, Kok MC, Taegtmeier M. Supervision of  
955 community health workers in Mozambique: A qualitative study of factors  
956 influencing motivation and programme implementation. *Hum Resour Health*  
957 [Internet]. 2015 Sep 1 [cited 2022 Dec 16];13(1):1–10. Available from:  
958 [https://human-resources-health.biomedcentral.com/articles/10.1186/s12960-015-](https://human-resources-health.biomedcentral.com/articles/10.1186/s12960-015-0063-x)  
959 [0063-x](https://human-resources-health.biomedcentral.com/articles/10.1186/s12960-015-0063-x)
- 960 63. Republic of Kenya Ministry of Health. Monitoring and Evaluation Plan for  
961 Community Health Services (2014 - 2018) [Internet]. Nairobi; 2014 Aug [cited  
962 2021 May 24]. Available from: [http://guidelines.health.go.ke:8000/media/CHS-](http://guidelines.health.go.ke:8000/media/CHS-ME_Plan_FINAL_201409022.pdf)  
963 [ME\\_Plan\\_FINAL\\_201409022.pdf](http://guidelines.health.go.ke:8000/media/CHS-ME_Plan_FINAL_201409022.pdf)
- 964 64. Agarwal S, Sripad P, Johnson C, Kirk K, Bellows B, Ana J, et al. A conceptual  
965 framework for measuring community health workforce performance within primary  
966 health care systems. *Hum Resour Health* [Internet]. 2019 [cited 2021 May  
967 24];17(86). Available from: <https://doi.org/10.1186/s12960-019-0422-0>
- 968 65. Kok MC, Ormel H, Broerse JEW, Kane S, Namakhoma I, Otiso L, et al.  
969 Optimising the benefits of community health workers' unique position between  
970 communities and the health sector: A comparative analysis of factors shaping  
971 relationships in four countries. *Glob Public Health* [Internet]. 2017 Nov 2 [cited  
972 2020 Dec 30];12(11):1404–32. Available from:  
973 <https://pubmed.ncbi.nlm.nih.gov/27133127/>
- 974 66. Glenton C, Cj C, Carlsen B, Swartz A, Lewin S, Noyes J, et al. Barriers and  
975 facilitators to the implementation of lay health worker programmes to improve  
976 access to maternal and child health: qualitative evidence synthesis (Review).  
977 2013 [cited 2021 Apr 26]; Available from: <http://www.thecochranelibrary.com>
- 978 67. Lopes DMQ, Beck CLC, Cassol Prestes F, Weiller HT, Colomé JS, Mafaccioli da  
979 Silva G. Experiences of Pleasure and Distress. *Rev Esc Enferm USP*.  
980 2012;46(3):630–7.
- 981
- 982
- 983

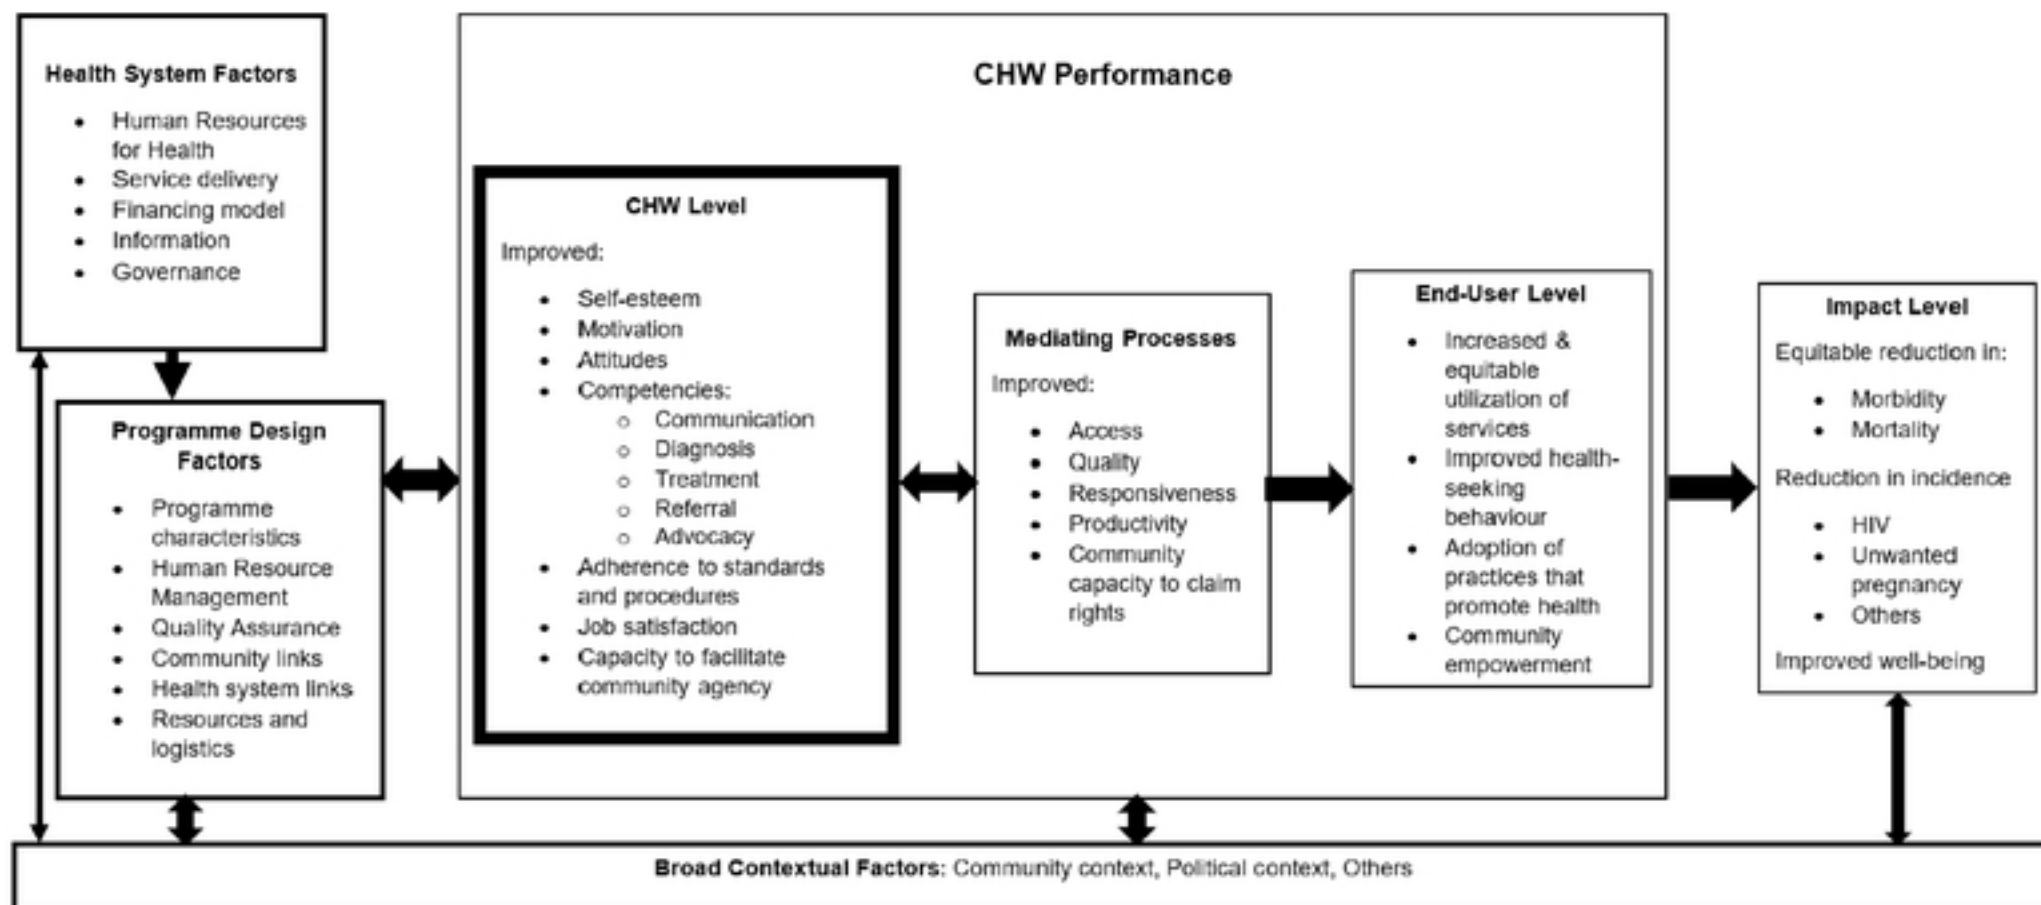

Figure 1: Kok et. al (2015) conceptual framework

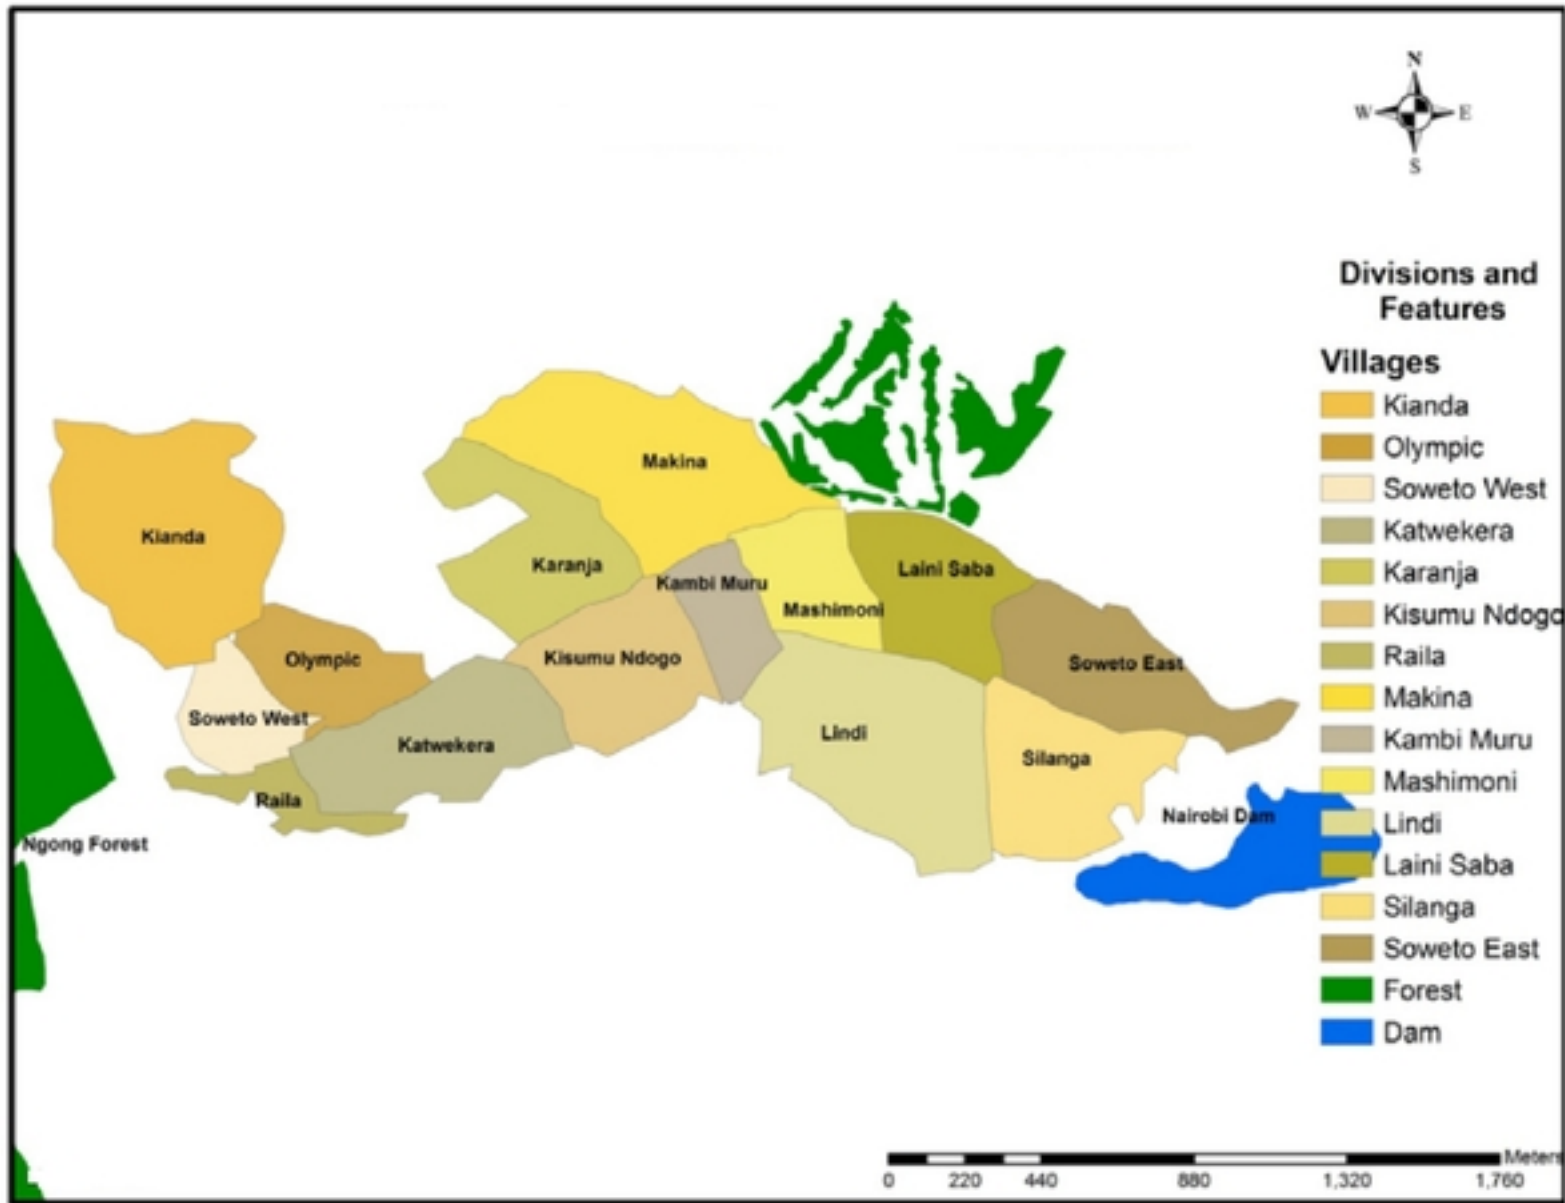

Fig. 2 Map of Kibera urban informal settlement

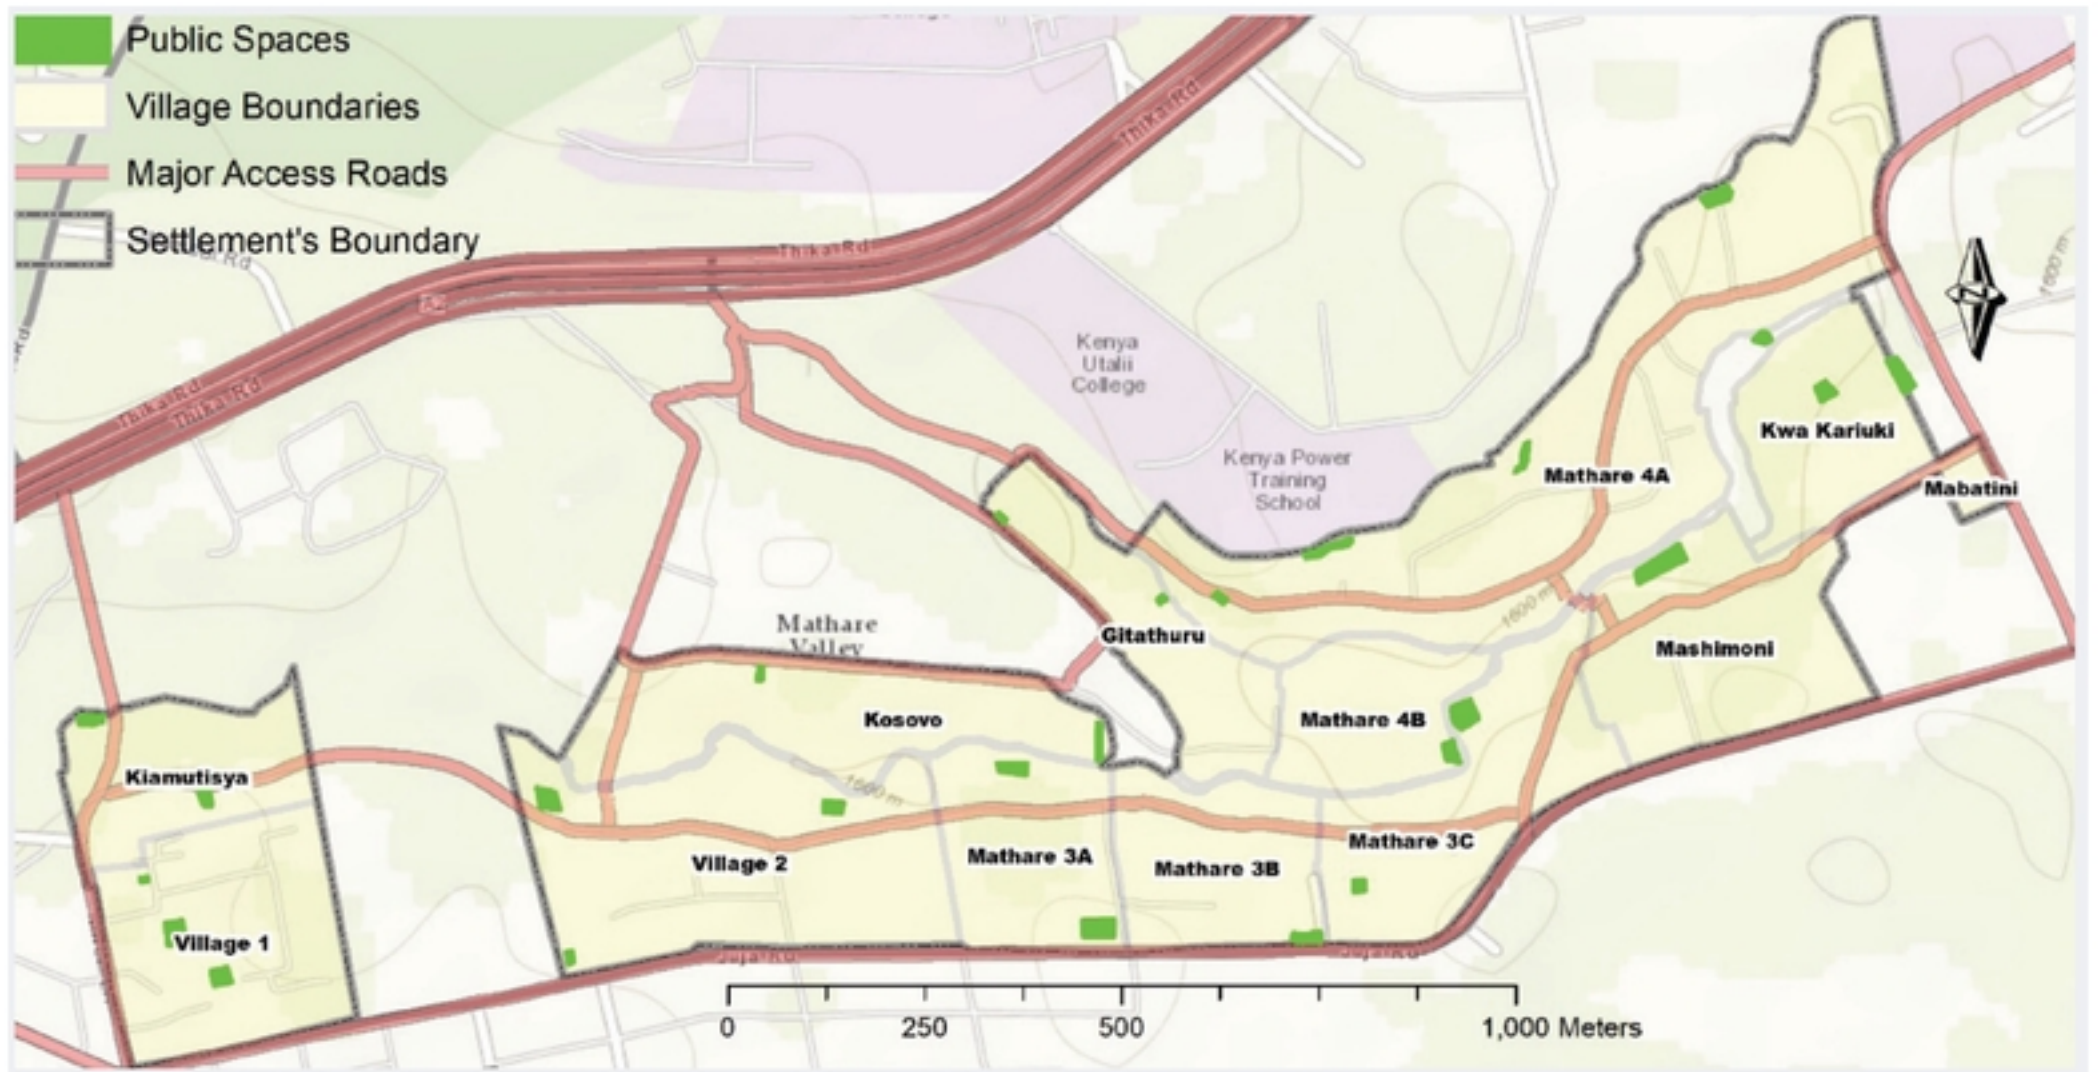

**Fig. 3 Map of Mathare urban informal settlement**
